# Supplementary material for: Mantle sources of Cenozoic volcanic activities around the South China Sea revealed by geochemical and isotopic data using the principal component analysis (PCA)
Source: Research Square preprint supplement (doi:10.21203/rs.3.rs-148976/v1), 2021-01-22
Supplement: Supplementary file 1 [file 3e3b2b68e9edffe7f873398d.doc]

**Appendix 5** Principal component values calculated by Sr, Nd, Pb isotopic ratios of the 61 combined samples and 5 standard samples

| No. | Location | Longitude&Latitude | Age | Rock type | PC1 | PC2 | Reference |
| --- | --- | --- | --- | --- | --- | --- | --- |
| 1 | Seamounts in SCS | 16.3°N, 116.1°E | 3-8Ma | Tephrite | 0.343 | 1.145 | Yan et al., 2008 |
| 2 | Seamounts in SCS | 15.6°N, 116.2°E | 3-8Ma | Tephrite | 0.204 | -0.380 | Yan et al., 2008 |
| 3 | Seamounts in SCS | 15.6°N, 116.2°E | 3-8Ma | Basalt | 0.954 | -0.011 | Yan et al., 2008 |
| 4 | Seamounts in SCS | 15.1°N, 116.5°E | 3-8Ma | Feldspathoid | 2.012 | -0.676 | Yan et al., 2008 |
| 5 | Seamounts in SCS | 14.0°N, 115.4°E | 3-8Ma | Tephrite | 3.493 | -1.319 | Yan et al., 2008 |
| 6 | Seamounts in SCS | 16.1°N, 113.9°E | 3-8Ma | Tephrite | 1.716 | 1.164 | Yan et al., 2008 |
| 7 | Seamounts in SCS | 14.0°N, 115.5°E | 3-8Ma | Tephrite | 1.340 | 0.618 | Yan et al., 2008 |
| 8 | Seamounts in SCS | 10.3°N, 112.5°E | 3-8Ma | Trachyte | 3.437 | -1.037 | Yan et al., 2008 |
| 9 | Seamounts in SCS | 17.6°N, 117.1°E | 16.5Ma | carbonate | 1.000 | 0.693 | Yan et al., 2015 |
| 10 | Seamounts in SCS | 17.6°N, 117.1°E | 16.5Ma | basaltic lava | 1.053 | 0.220 | Yan et al., 2015 |
| 11 | Seamounts in SCS | 17.6°N, 117.1°E | 16.5Ma | Basaltic lava | 1.091 | 0.202 | Yan et al., 2015 |
| 12 | Seamounts in SCS | 17.6°N, 117.1°E | 16.5Ma | Basaltic clasts | 1.704 | -0.609 | Yan et al., 2015 |
| 13 | South China Sea | 12.9°N, 115.0°E | 15-17Ma | basalt | -3.875 | -0.429 | Zhang et al., 2018 |
| 14 | South China Sea | 13.2°N, 114.9°E | 15-17Ma | basalt | -2.625 | -0.449 | Zhang et al., 2018 |
| 15 | South China Sea | 15.4°N, 117.0°E | 15-17Ma | basalt | -1.224 | 1.001 | Zhang et al., 2018 |
| 16 | South China Sea | 13.2°N, 115.0°E | 7.4-12.8Ma | Carbonated silicate melts | 1.342 | 0.799 | Zhang et al., 2017 |
| 17 | Southern Vietnam | 13.4°N, 109.3°E | 9.6Ma | Trachybasalt | 0.827 | -0.901 | An et al., 2017 |
| 18 | Southern Vietnam | 11.8°N, 108.6°E | 6.0Ma | Basanite | 0.246 | 0.095 | An et al., 2017 |
| 19 | Southern Vietnam | 11.8°N, 108.4°E | 4.1Ma | Basalt | 0.559 | 0.414 | An et al., 2017 |
| 20 | Southern Vietnam | 11.6°N, 108.2°E | 13.8Ma | Trachyandesite | 0.597 | 0.373 | An et al., 2017 |
| 21 | Southern Vietnam | 11.0°N, 107.2°E | 4.3Ma | Basanite | 0.264 | 0.170 | An et al., 2017 |
| 22 | Southern Vietnam | 11.0°N, 107.2°E | 4.2Ma | BTA | 0.574 | -2.046 | An et al., 2017 |
| 23 | Thailand | 14.7°N, 104.5°E | 3.3Ma | TB | 0.127 | -0.328 | Yan et al., 2018 |
| 24 | Thailand | 14.6°N, 104.5°E | 3.3Ma | BTA | -0.112 | -0.357 | Yan et al., 2018 |
| 25 | Thailand | 18.0°N, 99.4°E | 2.3-2.4Ma | BTA | -0.264 | -0.566 | Yan et al., 2018 |
| 26 | Thailand | 14.7°N, 101.2°E | 0.9Ma | Basalt | -0.449 | -0.012 | Yan et al., 2018 |
| 27 | Thailand | 14.6°N, 102.2°E | 0.9Ma | TB | 1.192 | -1.784 | Yan et al., 2018 |
| 28 | Thailand | 14.5°N, 102.9°E | 0.9Ma | TB | 2.141 | -1.933 | Yan et al., 2018 |
| 29 | Thailand | 14.5°N, 103.0°E | 0.9Ma | BTA | 2.454 | -2.931 | Yan et al., 2018 |
| 30 | Thailand | 14.5°N, 102.8°E | 0.9Ma | BTA | 2.522 | -2.692 | Yan et al., 2018 |
| 31 | Thailand | 18.3°N, 99.6°E | 0.6-0.8Ma | BTA | 2.061 | -2.237 | Yan et al., 2018 |
| 32 | Thailand | 18.3°N, 99.6°E | 0.6-0.8Ma | TB | 0.624 | -0.045 | Yan et al., 2018 |
| 33 | Thailand | 15.7°N, 101.2°E | 8.8-11Ma | TB | -0.959 | -0.029 | Yan et al., 2018 |
| 34 | Thailand | 15.7°N, 101.2°E | 8.8-11Ma | TB | -1.174 | -0.125 | Yan et al., 2018 |
| 35 | Eastern Beibu Gulf | 19.7°N, 109.2°E | 0-16Ma | AB | 0.613 | 0.260 | Li et al., 2013 |
| 36 | Eastern Beibu Gulf | 19.8°N, 109.2°E | 0-16Ma | QT | 0.151 | -0.146 | Li et al., 2013 |
| 37 | Eastern Beibu Gulf | 20.0°N,109.2°E | 0-16Ma | AB | 0.588 | 0.307 | Li et al., 2013 |
| 38 | Eastern Beibu Gulf | 20.0°N, 109.9°E | 0-16Ma | OT | 0.730 | -0.380 | Li et al., 2013 |
| 39 | Eastern Beibu Gulf | 20.9°N, 109.2°E | 0-16Ma | OT | 0.786 | 0.362 | Li et al., 2013 |
| 40 | South China Sea | 16.3°N, 116.1°E | 3.8-7.9Ma | Tephrite | 0.343 | 1.145 | Yan et al., 2008 |
| 41 | South China Sea | 15.6°N, 116.2°E | 3.8-7.9Ma | Basalt | 0.954 | -0.011 | Yan et al., 2008 |
| 42 | South China Sea | 15.6°N, 116.2°E | 3.8-7.9Ma | Tephrite | 0.204 | -0.380 | Yan et al., 2008 |
| 43 | South China Sea | 15.1°N, 116.5°E | 3.8-7.9Ma | Feldspathoid | 2.012 | -0.676 | Yan et al., 2008 |
| 44 | South China Sea | 14.0°N, 115.4°E | 3.8-7.9Ma | Tephrite | 3.493 | -1.319 | Yan et al., 2008 |
| 45 | South China Sea | 16.1°N, 113.9°E | 3.8-7.9Ma | Tephrite | 1.716 | 1.164 | Yan et al., 2008 |
| 46 | South China Sea | 14.0°N, 115.5°E | 3.8-7.9Ma | Tephrite | 1.340 | 0.618 | Yan et al., 2008 |
| 47 | South China Sea | 10.3°N, 112.5°E | 3.8-7.9Ma | Trachyte | 3.386 | -1.006 | Yan et al., 2008 |
| 48 | South China Sea | 10.3°N, 112.5°E | 3.8-7.9Ma | basalt | 3.487 | -1.068 | Yan et al., 2008 |
| 49 | Hainan Island | 20.0°N, 110.0°E | 17-32Ma | tholeiite | 1.134 | 0.213 | Tu et al., 1991 |
| 50 | Hainan Island | 20.0°N, 110.0°E | 17-32Ma | Alkali basalt | 1.010 | 0.176 | Tu et al., 1991 |
| 51 | Hainan Island | 20.0°N, 110.0°E | 17-32Ma | basanite | 0.232 | 0.326 | Tu et al., 1991 |
| 52 | South-central Vietnam | 15.4°N, 107.7°E | 7.0–16.5Ma | Basalt | 2.547 | 0.604 | Hoang et al., 2018 |
| 53 | South-central Vietnam | 15.4°N, 107.7°E | 7.0–16.5Ma | Basaltic andesite | 2.484 | 0.483 | Hoang et al., 2018 |
| 54 | South-central Vietnam | 14.3°N, 107.9°E | 0.2-6.4Ma | Trachybasalt | -0.337 | -0.872 | Hoang et al., 2018 |
| 55 | South-central Vietnam | 14.3°N, 107.9°E | 0.2-6.4Ma | Alkali basalt | 1.141 | -0.748 | Hoang et al., 2018 |
| 56 | South-central Vietnam | 15.4°N, 107.7°E | 7.0–16.5Ma | Basaltic andesite | 0.836 | -1.331 | Hoang et al., 2018 |
| 57 | South-central Vietnam | 11.8°N, 108.6°E | 0.3-8.7Ma | Basaltic andesite | 2.483 | 0.159 | Hoang et al., 2018 |
| 58 | South-central Vietnam | 11.8°N, 108.6°E | 0.3-8.7Ma | Basanite | 0.246 | 0.095 | Hoang et al., 2018 |
| 59 | South-central Vietnam | 15.4°N, 107.7°E | 7.0–16.5Ma | Basalt | 0.640 | 0.479 | Hoang et al., 2018 |
| 60 | South-central Vietnam | 11.0°N, 107.2°E | 0.3-8.7Ma | Basanite | 0.267 | 0.228 | Hoang et al., 2018 |
| 61 | South-central Vietnam | 11.0°N, 107.2°E | 0.3-8.7Ma | BTA | 0.508 | -2.013 | Hoang et al., 2018 |
| 62 |  |  |  | MORB | -8.386~-4.088 | -2.536~1.308 | Zindler and Hart, 1986 |
| 63 |  |  |  | EM1 | -0.189~2.260 | -7.337~-5.062 | Zindler and Hart, 1986 |
| 64 |  |  |  | EM2 | -1.809~-1.672 | -2.788~-0.693 | Zindler and Hart, 1986 |
| 65 |  |  |  | OIB | -1.968~5.547 | -7.667~-0.426 | Zindler and Hart, 1986 |
| 66 |  |  |  | HIMU | 6.887~9.619 | 5.842~8.586 | Zindler and Hart, 1986 |
