# Supplementary material for: Mantle sources of Cenozoic volcanic activities around the South China Sea revealed by geochemical and isotopic data using the principal component analysis (PCA)
Source: Research Square preprint supplement (doi:10.21203/rs.3.rs-148976/v1), 2021-01-22
Supplement: Supplementary file 2 [file e2f5fd7a6082d5ab3d82c1d3.docx]

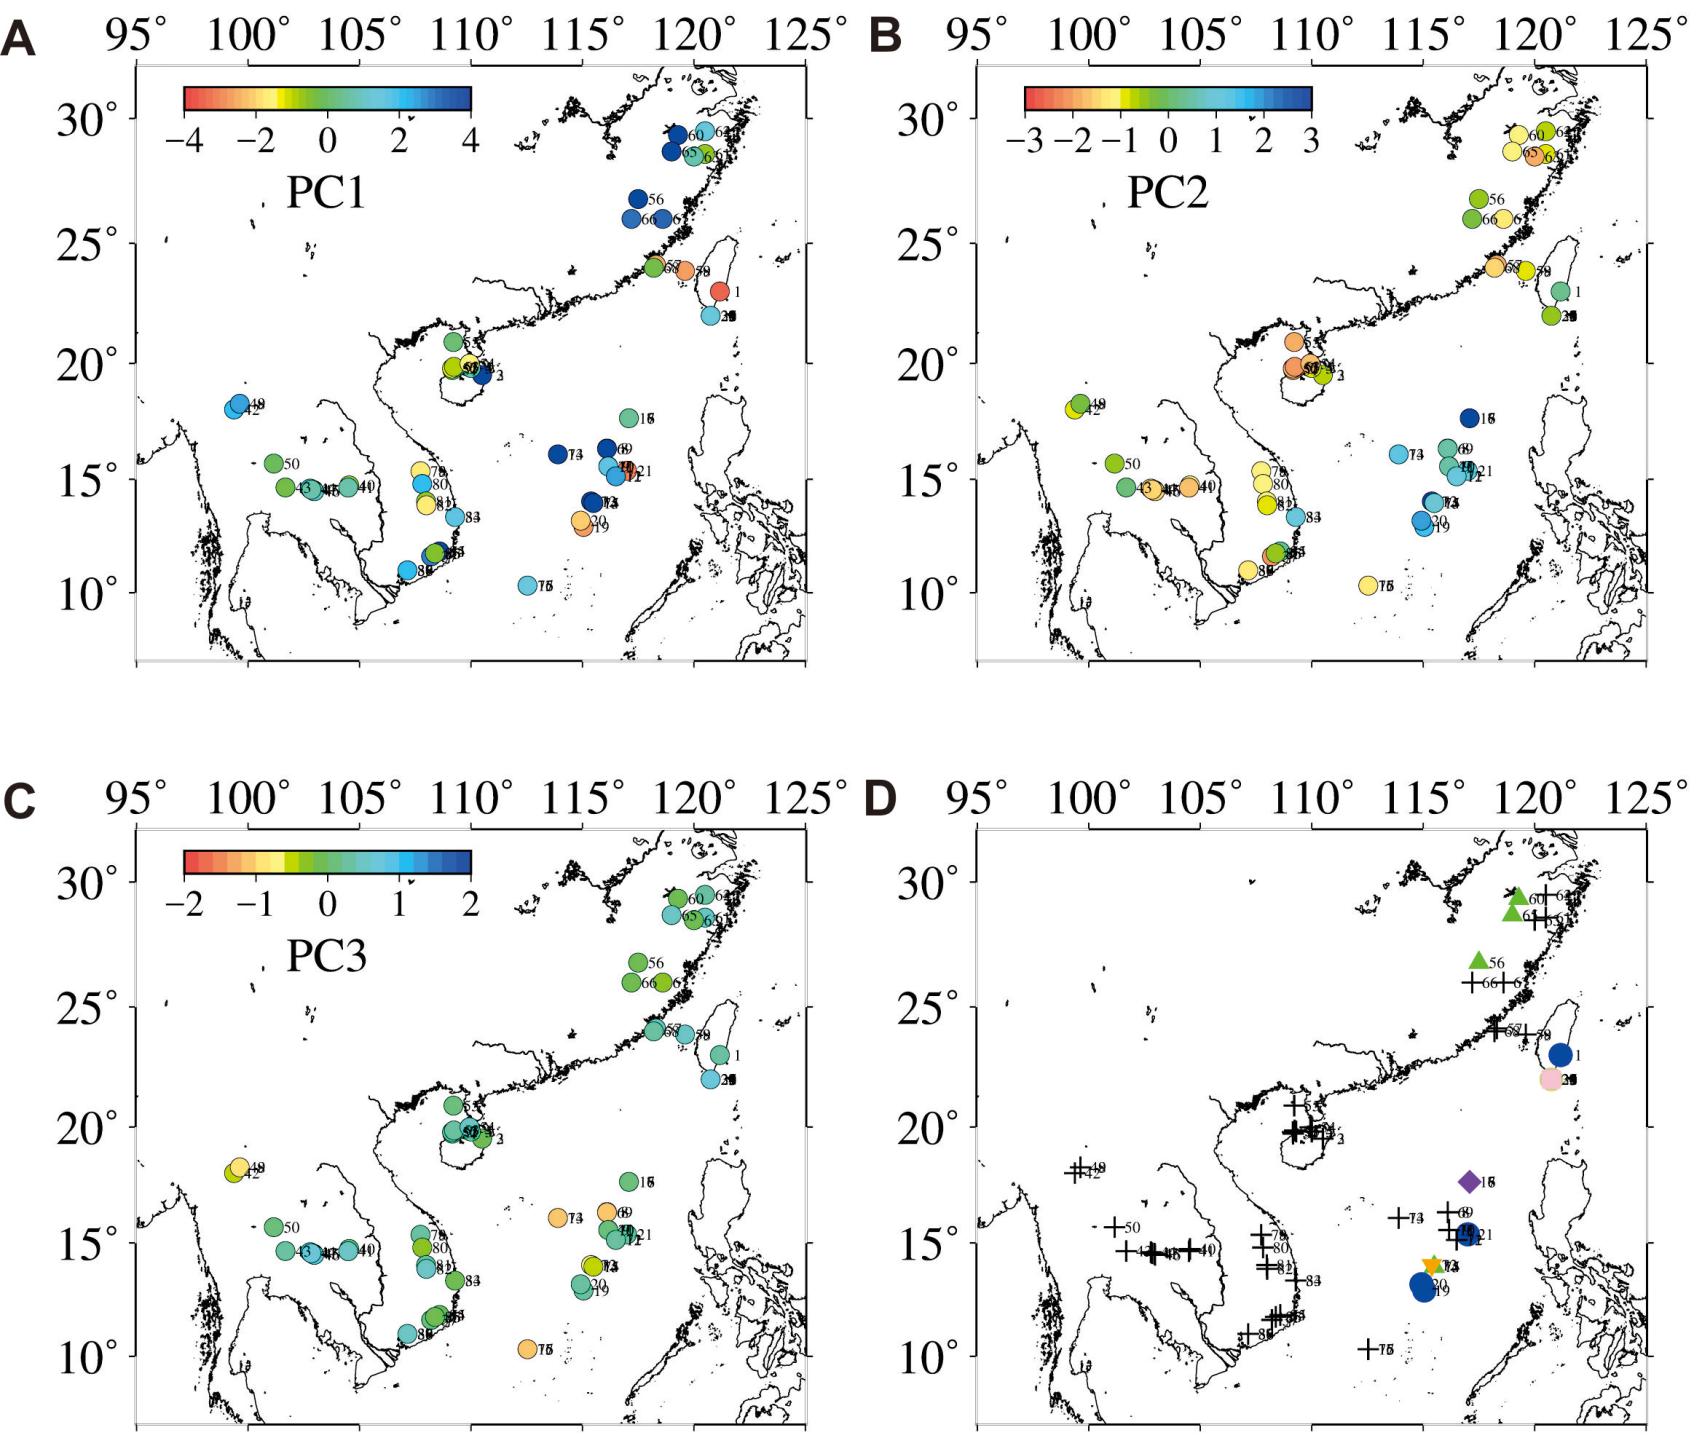


**Fig. S1** The spatial distribution of <33Ma volcanic rocks from the Southeast Asian based on principal component values calculated by trace elements.
